# Supplementary material for: Antimony Nanoparticles Encapsulated in Self-Supported Organic Carbon with a Polymer Network for High-Performance Lithium-Ion Batteries Anode
Source: MDPI journal article supplement (doi:10.3390/nano12142322), 2022-07-06
Supplement: s1 [file s1]

## Supplementary Materials

# Antimony Nanoparticles Encapsulated in Self-Supported Organic Carbon with a Polymer Network for High-Performance Lithium-Ion Batteries Anode

Zhaomin Wang <sup>1,2</sup>, Fanming Zeng <sup>1,2,\*</sup>, Dongyu Zhang <sup>3</sup>, Yabin Shen <sup>3</sup>, Shaohua Wang <sup>3</sup>, Yong Cheng <sup>3,4,5</sup>, Chun Li <sup>1,2,\*</sup> and Limin Wang <sup>3,\*</sup>

<sup>1</sup> School of Materials Science and Engineering, Changchun University of Science and Technology, Changchun 130022, China; zmwang@ciac.ac.cn

<sup>2</sup> Collaborative Innovation Center of Optical Materials and Chemistry, Changchun University of Science and Technology, Changchun 130022, China

<sup>3</sup> State Key Laboratory of Rare Earth Resource Utilization, Changchun Institute of Applied Chemistry, CAS, Changchun 130022, China; dyzhang@ciac.ac.cn (D.Z.); ybshen@ciac.ac.cn (Y.S.); shwang@ciac.ac.cn (S.W.); cyong@ciac.ac.cn (Y.C.)

<sup>4</sup> Key Laboratory of Preparation and Applications of Environmental Friendly Materials, Jilin Normal University, Ministry of Education, Changchun 130103, China

<sup>5</sup> State Key Laboratory of Metastable Materials Science and Technology, Yanshan University, Qinhuangdao 066004, China

\* Correspondence: zengfm@126.com (F.Z.); lichun1210@163.com (C.L.); lmwang@ciac.ac.cn (L.W.)

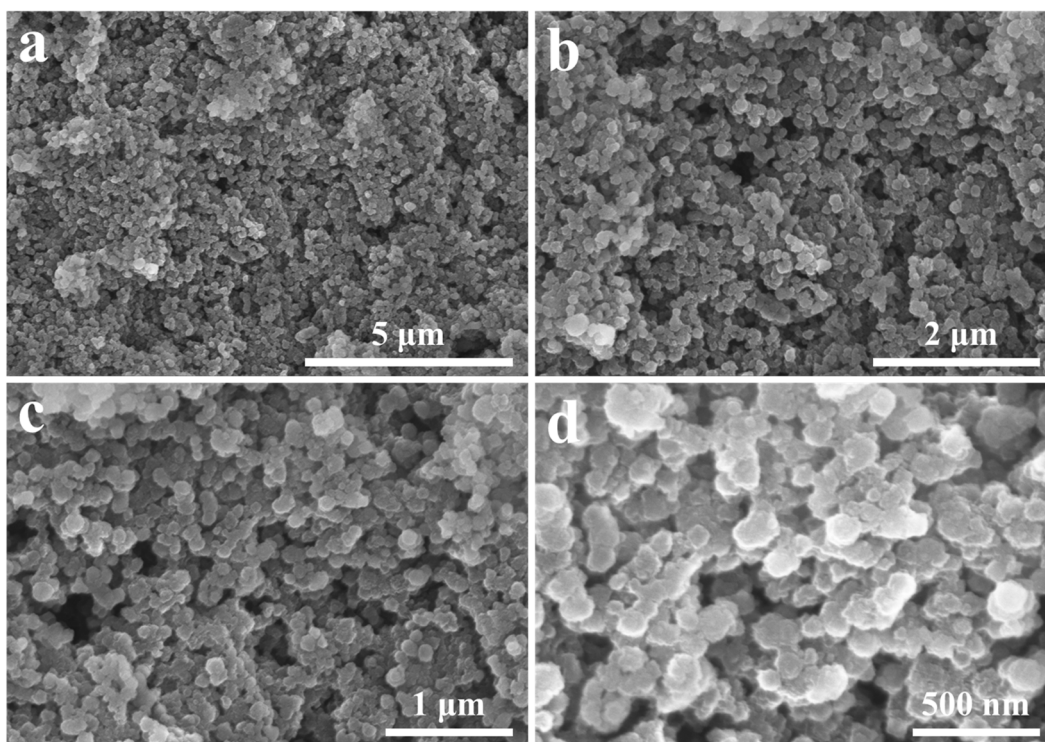

**Figure S1.** (a–d) SEM images of 3DPNS-Sb/C-2 after 100 cycles.

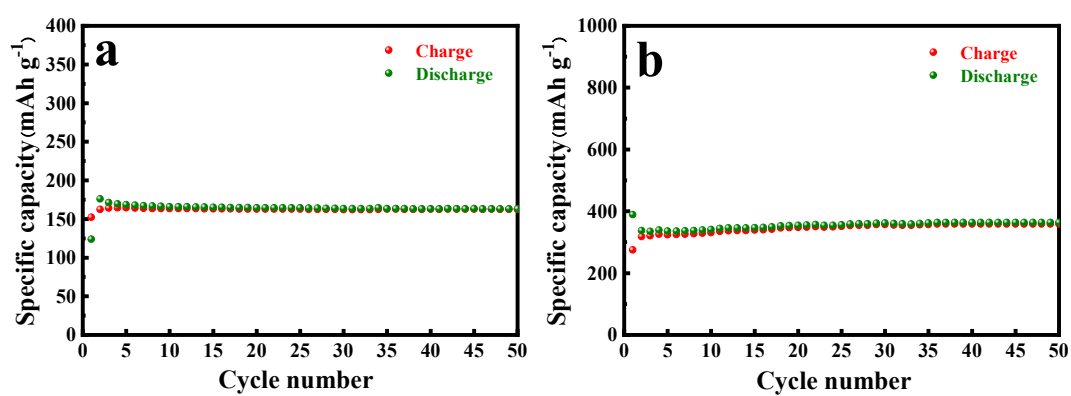

**Figure S2.** (a) Cycle performances of  $\text{Li}_4\text{Ti}_5\text{O}_{12}$  at  $0.5 \text{ A g}^{-1}$  for 50 cycles, (b) Cycle performances of graphite at  $0.5 \text{ A g}^{-1}$  for 50 cycles.
